# Supplementary material
Source: PubMed Central journal article supplement (PMC5576860)

## Supplementary Information

# Unique roles for histone H3K9me states in RNAi and heritable silencing of transcription

Gloria Jih<sup>1,2</sup>, Nahid Iglesias<sup>1,2</sup>, Mark A. Currie<sup>1,2</sup>, Natarajan V. Bhanu<sup>3</sup>, Joao A. Paulo<sup>1</sup>, Steven P. Gygi<sup>1</sup>, Benjamin A. Garcia<sup>3</sup>, Danesh Moazed<sup>1,2,\*</sup>

<sup>1</sup>Department of Cell Biology, <sup>2</sup>Howard Hughes Medical Institute, Harvard Medical School, Boston, MA, USA; <sup>3</sup>Department of Biochemistry and Biophysics, Epigenetics Program, Perelman School of Medicine, University of Pennsylvania, Philadelphia, PA, USA.

## Discussion

Our findings reveal unique roles for the methylation states of histone H3K9 in RNAi-dependent and -independent heterochromatin formation. Clr4 is the sole *S. pombe* enzyme responsible for H3K9 di- and trimethylation. Our generation of active site mutations in Clr4 that impair or completely block H3K9me3 (Clr4<sup>I418P</sup> and Clr4<sup>F449Y</sup>, respectively), but allow H3K9me2 catalysis, made it possible to investigate the role of each modification in heterochromatin formation.

First, we found that H3K9me2 defines a transcriptionally permissive chromatin state that is sufficient for the H3K9me-dependent recruitment of RNAi, siRNA amplification, and the spreading of H3K9me at pericentromeric DNA repeats (Fig. 4f). The cooperative association of the RITS complex with pericentromeric DNA repeats therefore requires the interaction of its siRNA-programmed Ago1 subunit with nascent noncoding pericentromeric transcripts and its Chp1 subunit with H3K9me2 (Fig 4f). H3K9me2 is also sufficient for the key steps downstream of this cooperative recruitment: RDRC- and Dcr1-mediated siRNA amplification and the spreading of H3K9me throughout siRNA producing domains, although H3K9me3 contributes to efficient siRNA amplification at the dh pericentromeric repeats. Importantly, the above events are restricted to chromosome regions that produce trigger sRNAs<sup>1,2</sup>.

Second, in cells lacking H3K9me3, we observed partial but substantial silencing of pericentromeric dg and dh transcripts without a reduction in RNA polymerase II occupancy (Fig. 1). This demonstrates a major role for H3K9me2- and RNAi-dependent co-transcriptional RNA degradation in silencing (RNAi-CTGS) and indicates that H3K9me3 is required for TGS (Fig 4f). Our findings, as well as previous reports<sup>3</sup>, provide an explanation for the dependence of CTGS and TGS on different H3K9me states based on the different affinities of downstream chromo domain proteins for H3K9me2 and H3K9me3 as follows. In native fission yeast whole

cell extracts, the Chp1 subunit of RITS binds to histone H3K9me2 and H3K9me3 with a similar efficiency, while Swi6, which is required for efficient TGS<sup>4,5</sup>, binds to H3K9me3 with higher efficiency (Fig. 3d-f).

Finally, the ability of Clr4 to catalyze H3K9me3 is required for epigenetic maintenance of silencing and H3K9me domains, even after the establishment of a large domain of heterochromatin containing both H3K9me2 and H3K9me3 (Fig. 4a-d). It was previously shown that ectopically established domains of H3K9me can be epigenetically inherited in the absence of sequence-dependent recruitment in cells in which the rate of H3K9 demethylation is reduced by deletion of *epe1*<sup>6,7</sup>. H3K9me domains and epigenetic states can also be stably transmitted in *epe1*<sup>+</sup> cells, but only within native heterochromatic domains such as the pericentromeric DNA repeats and the mating type locus<sup>6,8</sup>. Our findings indicate that H3K9me3 is required for epigenetic maintenance of silencing in both *epe1*Δ and *epe1*<sup>+</sup> cells. In *epe1*Δ cells, neither *ade6*<sup>+</sup> silencing nor a large domain of H3K9me2/3, induced by the ectopic recruitment of TetR-Clr4-I, could be maintained by Clr4<sup>I418P</sup>, which has reduced H3K9 tri-methylation activity. This loss of epigenetic information can be explained by the reduced affinity of the Clr4 chromo domain for H3K9me2 (Fig. 3d-f), which would reduce the strength of the positive feedback mechanism based on binding of Clr4 to H3K9me nucleosome and methylation of newly deposited nucleosomes (also referred to as the read-write mechanism). Additionally, the loss of TGS and the resulting transcription-coupled increase in histone exchange may contribute to instability of H3K9me2 domains. In *epe1*<sup>+</sup> cells, the residual RNAi-independent H3K9me present throughout pericentromeric DNA repeats is maintained epigenetically by a mechanism that requires the chromo domain of Clr4 (ref. <sup>6</sup>) and is lost when Clr4 cannot catalyze H3K9me3 (Fig. 4e, f).

Several previous studies have described the preferential association of histone H3K9me2 and H3K9me3 with euchromatic versus heterochromatic DNA domains<sup>9-14</sup>, have reported a role for H3K9me3 in peripheral nuclear localization of heterochromatin in *C. elegans*<sup>15</sup>, and have identified methyltransferases that catalyze H3K9me1 prior to chromatin assembly<sup>16</sup>. Moreover, different H3K4 methylation states are associated with enhancers, promoters, and transcribed regions, and perform distinct functions in recruitment of downstream factors associated with transcription<sup>17-20</sup>. The utility of histone lysine methylation states in signaling downstream events is therefore widespread in chromatin biology.

- 1 Halic, M. & Moazed, D. Dicer-independent primal RNAs trigger RNAi and heterochromatin formation. *Cell* **140**, 504-516, doi:S0092-8674(10)00020-6 [pii] 10.1016/j.cell.2010.01.019 (2010).
- 2 Yu, R., Jih, G., Iglesias, N. & Moazed, D. Determinants of heterochromatic siRNA biogenesis and function. *Mol Cell* **53**, 262-276, doi:10.1016/j.molcel.2013.11.014 (2014).
- 3 Schalch, T. *et al.* High-affinity binding of Chp1 chromodomain to K9 methylated histone H3 is required to establish centromeric heterochromatin. *Mol Cell* **34**, 36-46, doi:10.1016/j.molcel.2009.02.024 (2009).
- 4 Motamedi, M. R. *et al.* HP1 proteins form distinct complexes and mediate heterochromatic gene silencing by nonoverlapping mechanisms. *Mol Cell* **32**, 778-790, doi:S1097-2765(08)00806-X 10.1016/j.molcel.2008.10.026 (2008).
- 5 Sugiyama, T. *et al.* SHREC, an effector complex for heterochromatic transcriptional silencing. *Cell* **128**, 491-504 (2007).

- 6 Ragunathan, K., Jih, G. & Moazed, D. Epigenetics. Epigenetic inheritance uncoupled from sequence-specific recruitment. *Science* **348**, 1258699, doi:10.1126/science.1258699 (2015).
- 7 Audergon, P. N. *et al.* Epigenetics. Restricted epigenetic inheritance of H3K9 methylation. *Science* **348**, 132-135, doi:10.1126/science.1260638 (2015).
- 8 Wang, X. & Moazed, D. DNA sequence-dependent epigenetic inheritance of gene silencing and histone H3K9 methylation. *Science* **356**, 88-91, doi:10.1126/science.aaj2114 (2017).
- 9 Shinkai, Y. & Tachibana, M. H3K9 methyltransferase G9a and the related molecule GLP. *Genes Dev* **25**, 781-788, doi:10.1101/gad.2027411 (2011).
- 10 Zhu, J. *et al.* Genome-wide chromatin state transitions associated with developmental and environmental cues. *Cell* **152**, 642-654, doi:10.1016/j.cell.2012.12.033 (2013).
- 11 Jenuwein, T. & Allis, C. D. Translating the histone code. *Science* **293**, 1074-1080. (2001).
- 12 Kouzarides, T. Chromatin modifications and their function. *Cell* **128**, 693-705 (2007).
- 13 Rea, S. *et al.* Regulation of chromatin structure by site-specific histone H3 methyltransferases. *Nature* **406**, 593-599. (2000).
- 14 Fodor, B. D., Shukeir, N., Reuter, G. & Jenuwein, T. Mammalian Su(var) genes in chromatin control. *Annu Rev Cell Dev Biol* **26**, 471-501, doi:10.1146/annurev.cellbio.042308.113225 (2010).
- 15 Towbin, B. D. *et al.* Step-wise methylation of histone H3K9 positions heterochromatin at the nuclear periphery. *Cell* **150**, 934-947, doi:10.1016/j.cell.2012.06.051 (2012).
- 16 Pinheiro, I. *et al.* Prdm3 and Prdm16 are H3K9me1 methyltransferases required for mammalian heterochromatin integrity. *Cell* **150**, 948-960, doi:10.1016/j.cell.2012.06.048 (2012).
- 17 Hung, T. *et al.* ING4 mediates crosstalk between histone H3 K4 trimethylation and H3 acetylation to attenuate cellular transformation. *Mol Cell* **33**, 248-256, doi:10.1016/j.molcel.2008.12.016 (2009).
- 18 Taverna, S. D. *et al.* Yng1 PHD finger binding to H3 trimethylated at K4 promotes NuA3 HAT activity at K14 of H3 and transcription at a subset of targeted ORFs. *Mol Cell* **24**, 785-796, doi:10.1016/j.molcel.2006.10.026 (2006).
- 19 Vermeulen, M. *et al.* Selective anchoring of TFIID to nucleosomes by trimethylation of histone H3 lysine 4. *Cell* **131**, 58-69, doi:10.1016/j.cell.2007.08.016 (2007).
- 20 Kim, T. & Buratowski, S. Dimethylation of H3K4 by Set1 recruits the Set3 histone deacetylase complex to 5' transcribed regions. *Cell* **137**, 259-272, doi:10.1016/j.cell.2009.02.045 (2009).
- 21 Hong, E. J., Villen, J., Gerace, E. L., Gygi, S. P. & Moazed, D. A cullin E3 ubiquitin ligase complex associates with Rik1 and the Clr4 histone H3-K9 methyltransferase and is required for RNAi-mediated heterochromatin formation. *RNA Biol* **2**, 106-111, doi:2131 [pii] (2005).
- 22 Buker, S. M. *et al.* Two different Argonaute complexes are required for siRNA generation and heterochromatin assembly in fission yeast. *Nat Struct Mol Biol* **14**, 200-207 (2007).
- 23 Li, H. *et al.* An alpha motif at Tas3 C terminus mediates RITS cis spreading and promotes heterochromatic gene silencing. *Molecular cell* **34**, 155-167, doi:10.1016/j.molcel.2009.02.032 (2009).

**Supplementary Table 1 | List of strains used in this study.**

| Strain  | Genotype                                                                                                        | Source |
|---------|-----------------------------------------------------------------------------------------------------------------|--------|
| SPY137  | <i>h<sup>+</sup> leu1-32 ade6-M210 ura4-DS/E otr1R(SphI)::ura4<sup>+</sup></i>                                  | 2      |
| SPY815  | SPY137 <i>clr4Δ::kanMX6</i>                                                                                     | 3      |
| SPY1098 | SPY137 <i>swi6Δ::natMX6</i>                                                                                     | 6      |
| SPY1368 | SPY137 <i>chp2Δ::kanMX6</i>                                                                                     | 5      |
| SPY2421 | SPY137 <i>chp1Δ::TAP-kanMX6</i>                                                                                 | 1      |
| SPY4719 | SPY137 <i>ago1Δ::kanMX6</i>                                                                                     | 1      |
| SPY797  | SPY137 <i>natMX6-5'-3xflag-ago1</i>                                                                             | 4      |
| SPY2337 | SPY137 <i>natMX6-5'-3xflag-ago1, clr4Δ::kan</i>                                                                 | 1      |
| SPY8072 | SPY137 <i>natMX6-5'-3xflag-ago1, kanMX6-5'(1kb)-clr4<sup>F449Y</sup></i>                                        | 1      |
| SPY4636 | SPY137 <i>hphMX6-5'(1kb)-3xflag-clr4</i>                                                                        | 1      |
| SPY4639 | SPY137 <i>hphMX6-5'(1kb)-3xflag-clr4<sup>H410L, C412A</sup></i>                                                 | 1      |
| SPY4642 | SPY137 <i>hphMX6-5'(1kb)-3xflag-clr4<sup>F449Y</sup></i>                                                        | 1      |
| SPY5562 | SPY137 <i>kanMX6-5'(1kb)-3xflag-clr4<sup>W31G</sup></i>                                                         | 1      |
| SPY6537 | SPY137 <i>hphMX6-5'(1kb)-3xflag-clr4<sup>I418P</sup></i>                                                        | 1      |
| SPY6529 | SPY137 <i>hphMX6-5'(1kb)-3xflag-clr4<sup>I418P</sup>, ago1Δ::kanMX6</i>                                         | 1      |
| SPY5378 | SPY137 <i>hphMX6-5'(700bp)-3xflag-chp2</i>                                                                      | 1      |
| SPY5380 | SPY137 <i>hphMX6-5'(700bp)-3xflag-chp2, clr4Δ::kanMX6</i>                                                       | 1      |
| SPY5382 | SPY137 <i>hphMX6-5'(700bp)-3xflag-chp2, kanMX6-5'(1kb)-clr4<sup>F449Y</sup></i>                                 | 1      |
| SPY5593 | SPY137 <i>hphMX6-5'(900bp)-3xflag-clr3</i>                                                                      | 1      |
| SPY5595 | SPY137 <i>hphMX6-5'(900bp)-3xflag-clr3, clr4Δ::kanMX6</i>                                                       | 1      |
| SPY5597 | SPY137 <i>hphMX6-5'(900bp)-3xflag-clr3, kanMX6-5'(1kb)-clr4<sup>F449Y</sup></i>                                 | 1      |
| SPY6481 | SPY137 <i>natMX6-5'(0.5kb)-3xflag-swi6</i>                                                                      | 1      |
| SPY5659 | SPY137 <i>kanMX6-5'(1kb)-clr4<sup>F449Y</sup>, natMX6-5'(0.5kb)-3xflag-swi6</i>                                 | 1      |
| SPY5086 | <i>h<sup>+</sup> leu1-32 ade6? ura4Δ::10xtetO-ade6, clr4Δ::nat-clr4p-NLS-TetR-2xflag-clr4ACD, epe1Δ::kanMX6</i> | 7      |
| SPY5244 | SPY5086 <i>trp1::hphMX6-5'(1kb)-3xflag-clr4-3'(1kb)</i>                                                         | 1      |
| SPY5245 | SPY5086 <i>trp1::hphMX6-5'(1kb)-clr4<sup>W31G</sup>-3'(1kb)</i>                                                 | 1      |
| SPY5248 | SPY5086 <i>trp1::hphMX6-5'(1kb)-clr4<sup>F449Y</sup>-3'(1kb)</i>                                                | 1      |
| SPY6326 | SPY5086 <i>trp1::hphMX6-5'(1kb)-clr4<sup>I418P</sup>-3'(1kb)</i>                                                | 1      |

1 = this study; 2 = Karl Ekwall; 3 = ref. <sup>21</sup>; 4 = ref. <sup>22</sup>; 5 = ref. <sup>4</sup>; 6 = ref. <sup>23</sup>; 7 = ref. <sup>6</sup>

**Supplementary Table 2 | List of primers used in this study.**

| Target        | Primer | Orientation | Sequence                      |
|---------------|--------|-------------|-------------------------------|
| <i>dg</i>     | GJ195  | Forward     | GGTTAAAGCGTTGTTTGGCACTG       |
| <i>dg</i>     | GJ196  | Reverse     | TGACGAGGCACATTCCCTTATACGC     |
| <i>dg2</i>    | GJ736  | Forward     | GCGAAACGAATGCCAAATAC          |
| <i>dg2</i>    | GJ737  | Reverse     | GGAAAGTGGCTTCACACTATAA        |
| <i>dh</i>     | AS133  | Forward     | GTATTTGGATTCCATCGGTACTIONATGG |
| <i>dh</i>     | AS134  | Reverse     | ACTACATCGACACAGAAAAGAAAACAA   |
| <i>dh2</i>    | GJ254  | Forward     | GTCGTTGTCAACCGCACTTCCTTT      |
| <i>dh2</i>    | GJ255  | Reverse     | GCATGCTCCGTTGCTTATCTCGTT      |
| <i>ura4</i>   | GJ412  | Forward     | GGTTTGAGAAGCATAACCGATTT       |
| <i>ura4</i>   | GJ413  | Reverse     | CCTTTAACATCCAAGCCGATAC        |
| <i>act1</i>   | MB90   | Forward     | CAACCCTCAGCTTTGGGTCTTG        |
| <i>act1</i>   | MB91   | Reverse     | TCCTTTTGCATACGATCGGCAATAC     |
| <i>fbp1</i>   | GJ173  | Forward     | ATTGACGCCGGTGTAGTGTAGGT       |
| <i>fbp1</i>   | GJ174  | Reverse     | TGACACGATGACCTGTGGTAAGCA      |
| <i>ade6</i>   | KR111  | Forward     | TTGCAGGAGAGGGTTCAACAGCA       |
| <i>ade6</i>   | KR112  | Reverse     | AATGCATCATCTTGATGCAGCAA       |
| <i>mug135</i> | KR124  | Forward     | GAGCCTCATGTCCATACGATCAACCT    |
| <i>mug135</i> | KR125  | Reverse     | AATCGATGGATGAGTGGAGAAAGTCG    |

Extended Data Fig 1a, upper panel

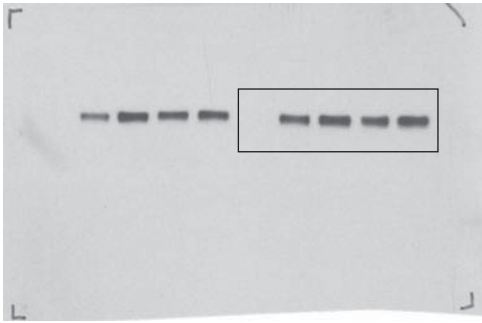

Extended Data Fig 1a, lower panel

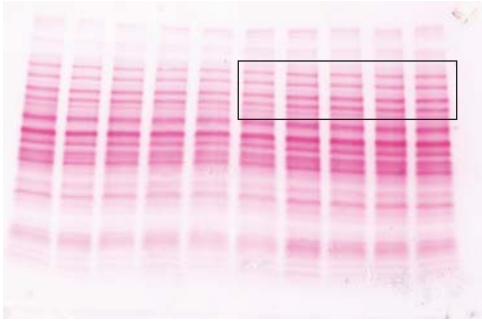

Extended Data Fig 1c

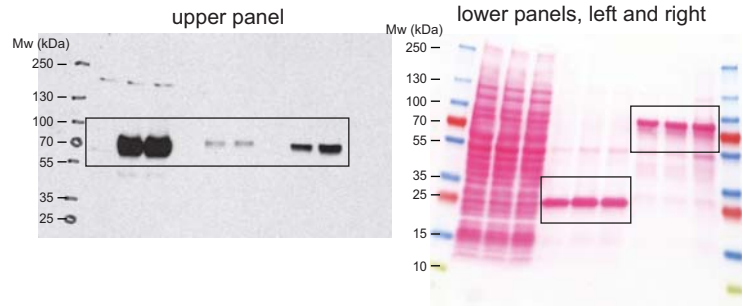

Extended Data Fig 1d

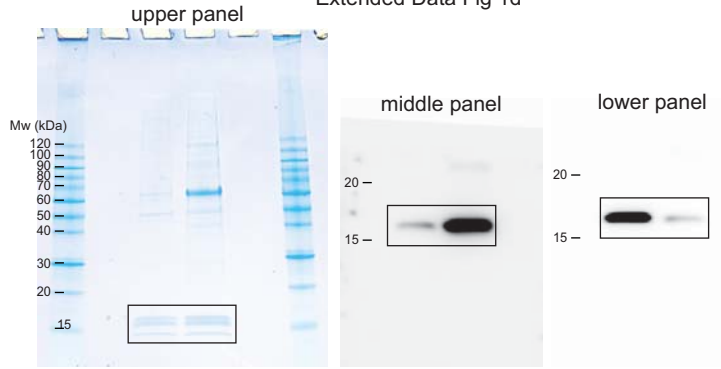

Fig 2b, upper panel

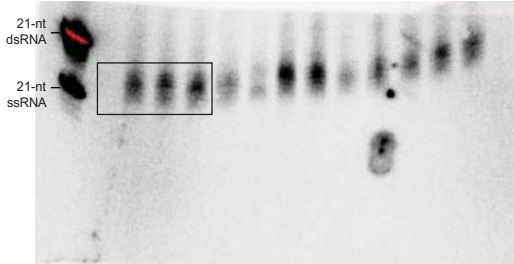

Fig 2b, middle panel

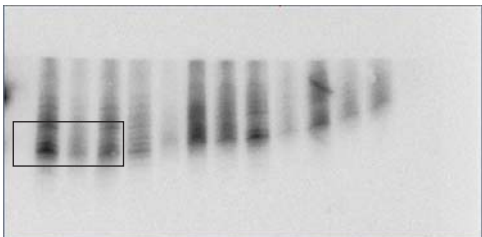

Fig 2b, lower panel

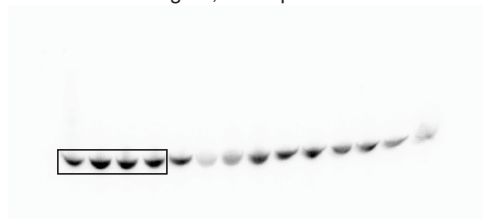

Fig 3e, upper panel

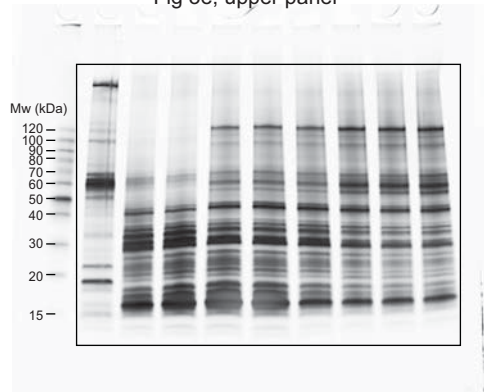

Fig 3e, middle panel

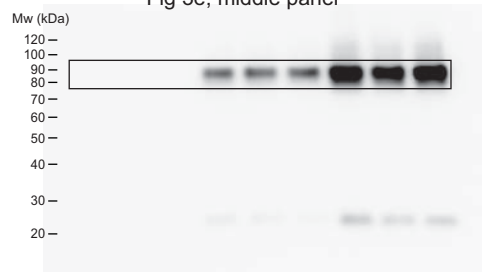

Fig 3e, lower panel

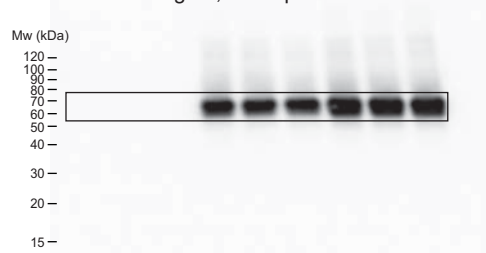

Supplement: NIHMS885608-supplement-1.pdf [file NIHMS885608-supplement-1.pdf]
